# Supplementary material for: Optimizing Inorganic Carbon Sequestration and Crop Yield With Wollastonite Soil Amendment in a Microplot Study
Source: PubMed Central journal article supplement (PMC7350405; doi:10.3389/fpls.2020.01012), 2020-07-03
Supplement: DataSheet_1.pdf [file DataSheet_1.pdf]

## Supplementary Material

### Microplot set up data

The rooftop experiment was conducted in Guelph, ON, Canada. However, the nearest historical weather data available was located on Kitchener/Waterloo (20 km distance), as shown in Figures S1a and S1b.

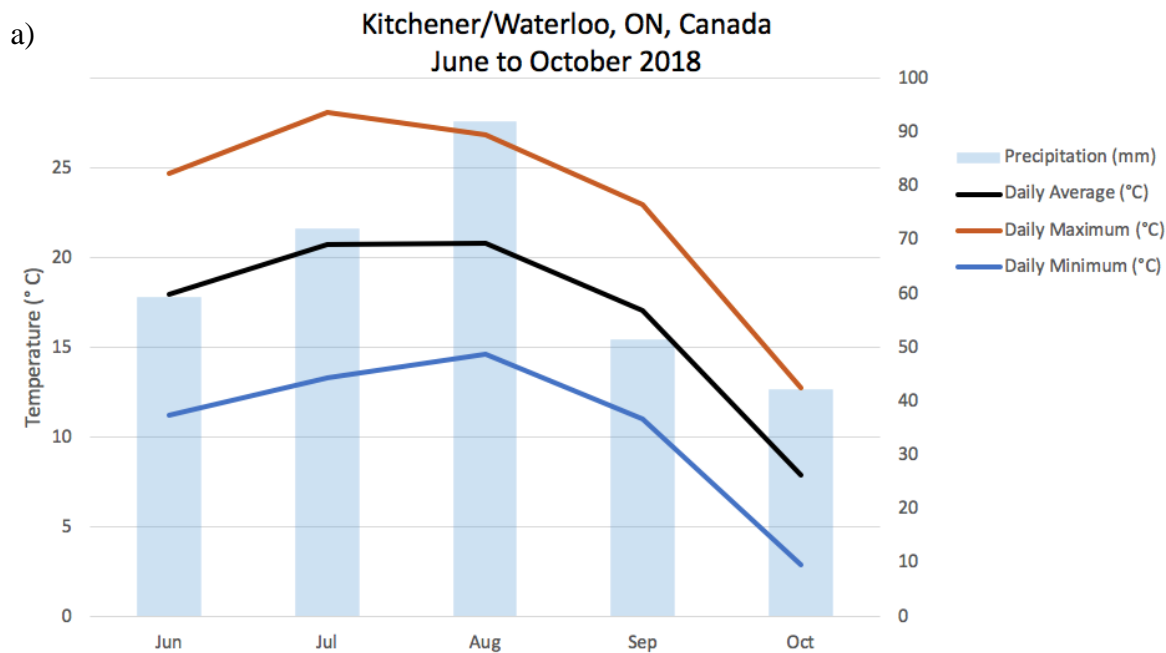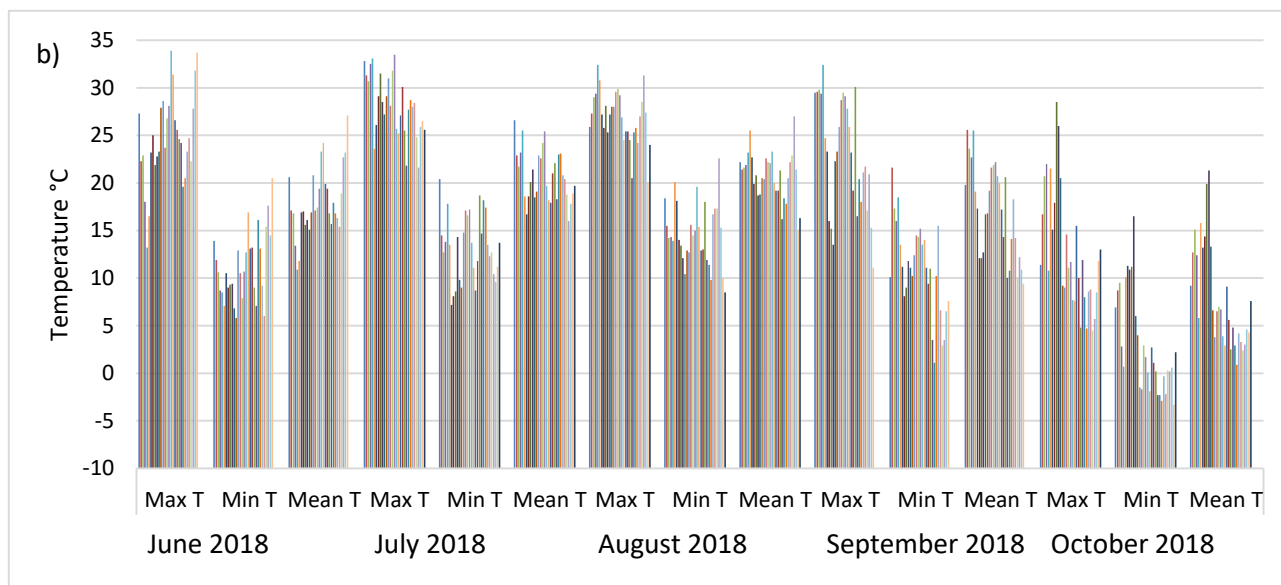

c)

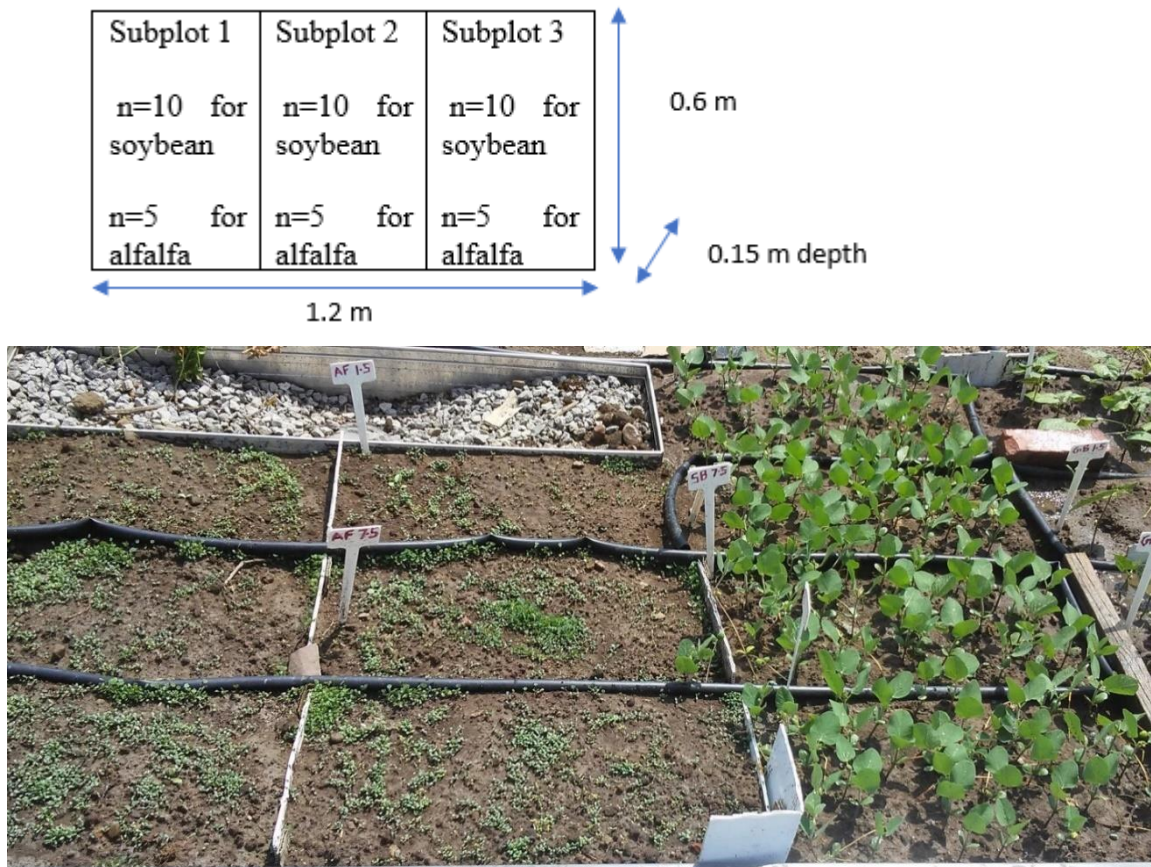

**Figure S1.** a) Kitchener/Waterloo, ON (Canada) weather historical data from June to October of 2018 during the experiment (Environment and Climate Change Canada, 2019) (Reused with permission: CC BY 4.0 (Dudhaiya et al., 2019)). b) Daily maximum, minimum, and mean temperature data June to October of 2018 during the experiment (Environment and Climate Change Canada, 2019). c) Microplot set up and a sample picture of the plots.

Figure S1c shows the experimental design. Each microplot has a dimension of 0.6 m length, 1.2 m width, and 0.15 m depth, and each subplot represents one-third of the microplot. For the soybean, 10 soybean seeds were sowed, in rows, per subplot, and for alfalfa the seeding rate was  $1.3 \text{ g/m}^2$ . Since the alfalfa seeds are very small, the spreading was done on mass basis, as practiced in the fields, in a random order. For the plant analysis, all the soybean plants were harvested and analyzed ( $n=30$  for the microplot or  $n=10$  for each subplot). In case of alfalfa, there were numerous plants, therefore 5 plants per subplot was chosen for analysis ( $n=15$  for each microplot). For soybean, yield is also determined, therefore all the plants were harvested.

### **Additional materials and samples data**

Elemental composition of the soil was quantified by Wavelength Dispersive X-Ray Fluorescence (WDXRF, Malvern Panalytical Zetium). Duplicate samples, in loose powder form, were analyzed for 20 minutes using standardless Omnia method, under helium and at 1 kW power, and concentrations were calculated as oxides. The average sum before normalization was 70.7 wt%, with the balance being porosity and undetectable light elements (H, C, O, N). The average concentrations of the detected oxides present in amounts greater than 0.10 wt%, normalized to 100%, in decreasing order, were: 65.06 wt% SiO<sub>2</sub>; 14.71 wt% Al<sub>2</sub>O<sub>3</sub>; 6.27 wt% Fe<sub>2</sub>O<sub>3</sub>; 3.62 wt% CaO; 3.03 wt% K<sub>2</sub>O; 2.02 wt% P<sub>2</sub>O<sub>5</sub>; 1.81 wt% MgO; 1.51 wt% Na<sub>2</sub>O; 1.19 wt% TiO<sub>2</sub>; 0.34 wt% SO<sub>3</sub>; 0.15 wt% MnO; 0.10 BaO; 0.10 wt% ZrO<sub>2</sub>.

**Table S1:** Soil characteristics

|                                            |                                                                                                                                                                              |
|--------------------------------------------|------------------------------------------------------------------------------------------------------------------------------------------------------------------------------|
| pH                                         | 6.63                                                                                                                                                                         |
| Dry organic matter                         | 32 g/kg                                                                                                                                                                      |
| Soil texture                               | Sandy Loam                                                                                                                                                                   |
| Gravel                                     | 11 g/kg                                                                                                                                                                      |
| Sand                                       | 551 g/kg                                                                                                                                                                     |
| Silt                                       | 295 g/kg                                                                                                                                                                     |
| Clay                                       | 155 g/kg                                                                                                                                                                     |
| XRF                                        |                                                                                                                                                                              |
|                                            | SiO <sub>2</sub> 65.06 wt%                                                                                                                                                   |
|                                            | Al <sub>2</sub> O <sub>3</sub> 14.71 wt%                                                                                                                                     |
|                                            | Fe <sub>2</sub> O <sub>3</sub> 6.27 wt%                                                                                                                                      |
|                                            | CaO 3.62 wt%                                                                                                                                                                 |
|                                            | K <sub>2</sub> O 3.03 wt%                                                                                                                                                    |
|                                            | P <sub>2</sub> O <sub>5</sub> 2.02 wt%                                                                                                                                       |
|                                            | MgO 1.81 wt%                                                                                                                                                                 |
|                                            | Na <sub>2</sub> O 1.51 wt%                                                                                                                                                   |
|                                            | TiO <sub>2</sub> 1.19 wt%                                                                                                                                                    |
|                                            | SO <sub>3</sub> 0.34 wt%                                                                                                                                                     |
|                                            | MnO 0.15 wt%                                                                                                                                                                 |
|                                            | BaO 0.10 wt%                                                                                                                                                                 |
|                                            | ZrO <sub>2</sub> 0.10 wt%                                                                                                                                                    |
| Malvern Panalytical Zetium Specifications: | Elemental range of Na - Am.<br>Concentration range of ppm - 100 wt%.<br>High count rate capability of up to 1 Mcps<br>Spot size of 0.5 mm.<br>Stepwise positioning of 100 μm |

**Table S2:** Soybean stem width and leaf blade width with different dosages of wollastonite amendment. In all cases, n = 30 and the uncertainties are the standard deviation.

|                 | Soil (Control) | MSA 1.5    | MSA 5      | MSA 7.5    | MSA 10     |
|-----------------|----------------|------------|------------|------------|------------|
| Stem width (mm) | 3.2 ± 0.3      | 3.0 ± 0.3  | 3.1 ± 0.3  | 3.0 ± 0.4  | 3.1 ± 0.4  |
| Leaf blade (mm) | 29.8 ± 3.6     | 31.0 ± 4.2 | 32.3 ± 3.3 | 30.1 ± 4.2 | 30.1 ± 4.2 |

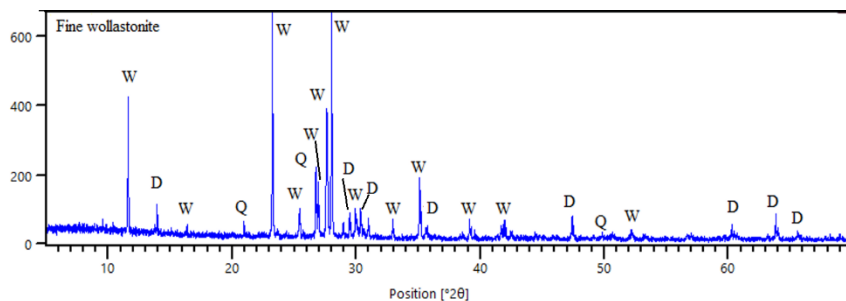

**Figure S2.** XRD diffractogram of the wollastonite, determined for to identify the major mineral phases. (W: Wollastonite, D: Diopside, Q: Quartz).

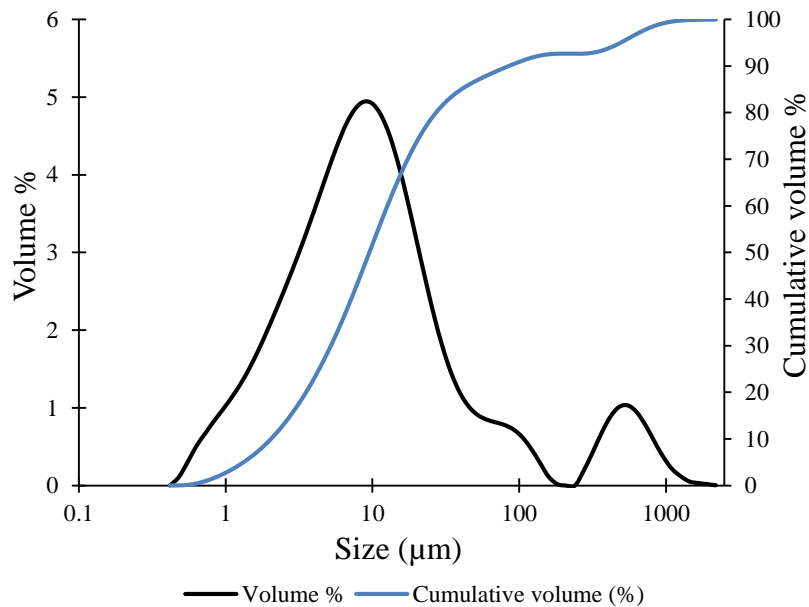

**Figure S3.** Particle size distribution of Canadian wollastonite, determined by wet laser diffraction.

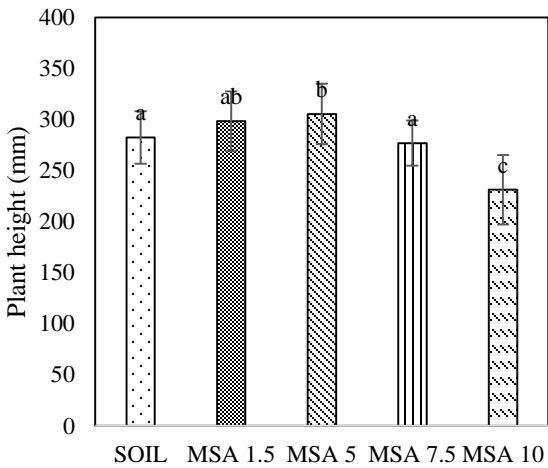

**Figure S4.** Variation in the soybean plant height with different dosages (wt% in soil) of wollastonite mineral soil amendment (MSA). In all cases,  $n = 30$  and statistically analyzed using Tukey test.

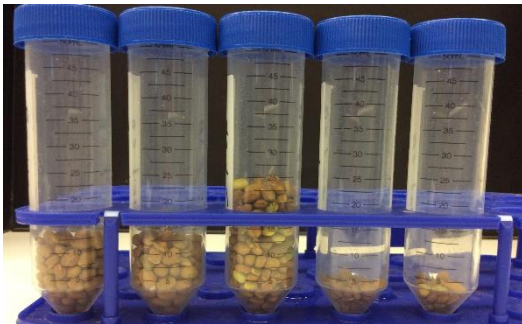

**Figure S5.** Soybean seeds produced from each microplot (30 plants) with different dosages of wollastonite amendment (left to right: SOIL, MSA 1.5, MSA 5, MSA 7.5, MSA 10).

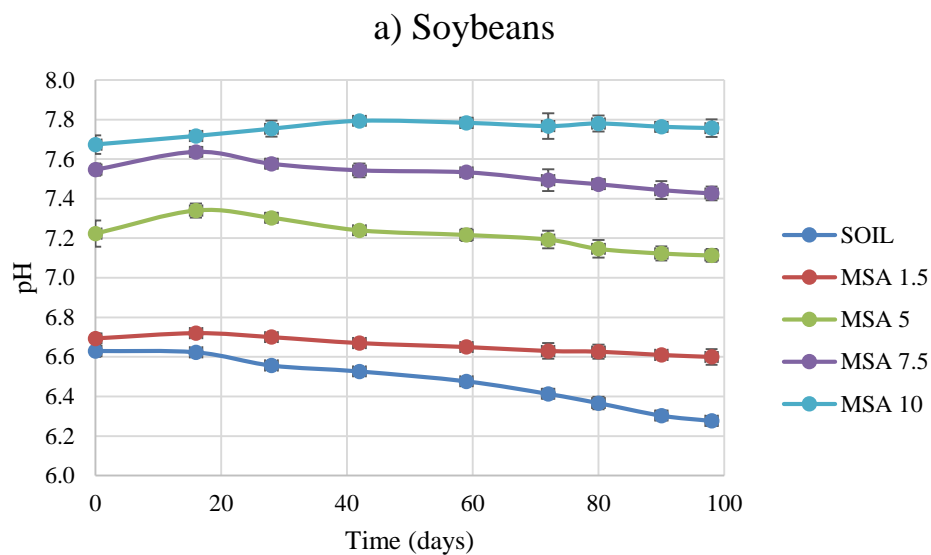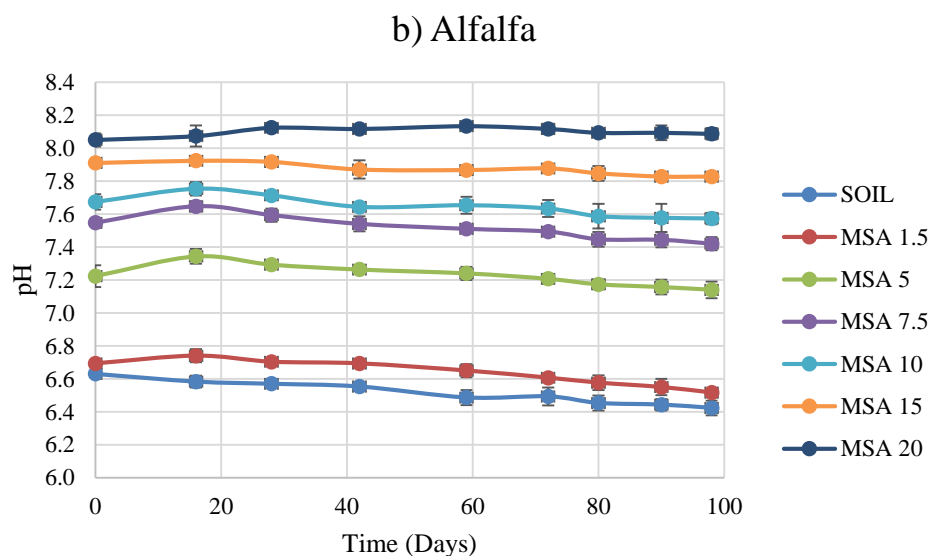

**Figure S6.** Variation of pH with time of various wollastonite-amended soils grown with a) soybeans and b) alfalfa.

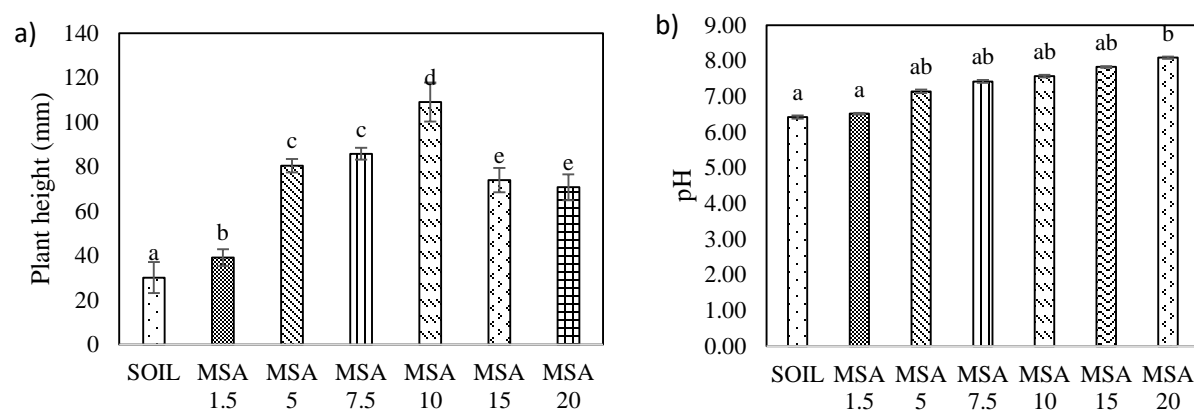

**Figure S7.** Variation in the alfalfa: a) plant height and b) pH of the soil at the end of the experiments, with different dosages (wt% in soil) of wollastonite mineral soil amendment (MSA).

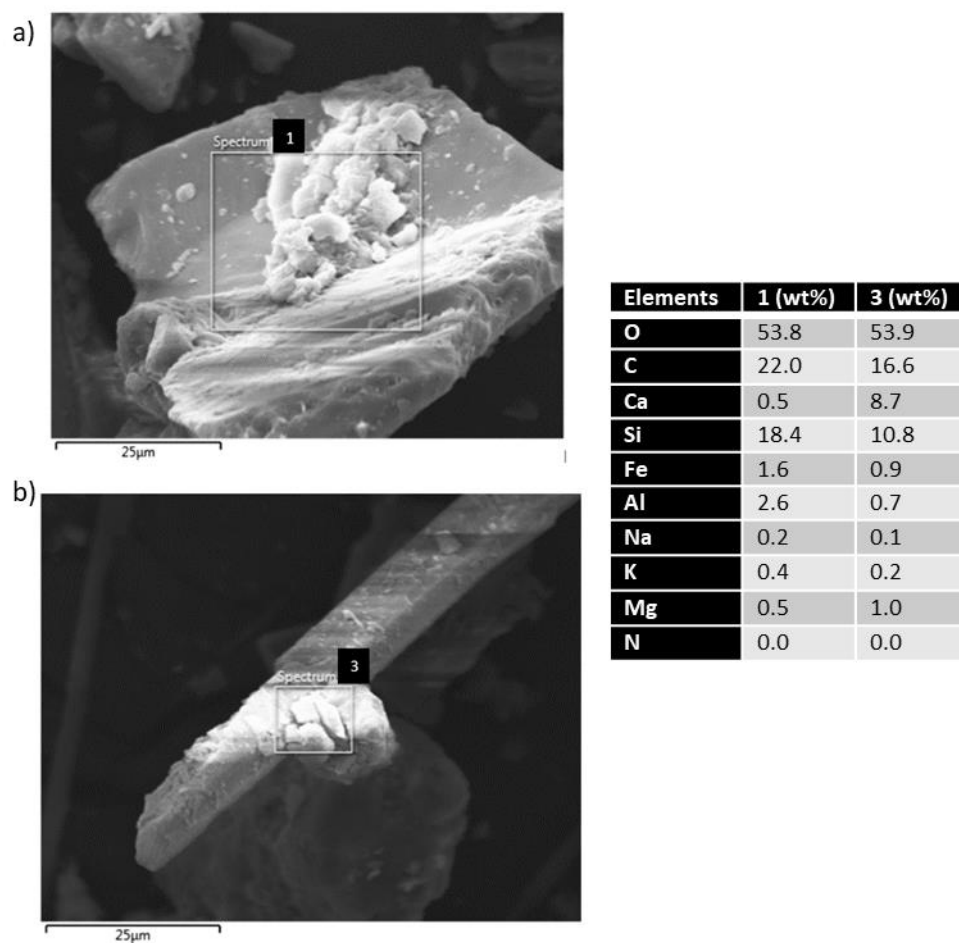

**Figure S8.** SEM images of mineral fragments from soil amended with wollastonite: a) quartz associated with organic matter; and b) needle shaped wollastonite associated with organic matter.



**Measured Data:**

Soybean root dry biomass (g)

| n  | SOIL   | MSA<br>1.5 | MSA 5  | MSA<br>7.5 | MSA<br>10 |
|----|--------|------------|--------|------------|-----------|
| 1  | 0.3341 | 0.338      | 0.5534 | 0.3588     | 0.33      |
| 2  | 0.2864 | 0.3843     | 0.5313 | 0.3997     | 0.2025    |
| 3  | 0.2974 | 0.3912     | 0.3036 | 0.1898     | 0.1054    |
| 4  | 0.2546 | 0.3507     | 0.3196 | 0.3962     | 0.27      |
| 5  | 0.3214 | 0.3893     | 0.4888 | 0.3453     | 0.3679    |
| 6  | 0.3364 | 0.2877     | 0.5029 | 0.5205     | 0.4843    |
| 7  | 0.3647 | 0.4153     | 0.324  | 0.3221     | 0.1844    |
| 8  | 0.4001 | 0.35       | 0.4581 | 0.381      | 0.2559    |
| 9  | 0.4214 | 0.3192     | 0.588  | 0.379      | 0.332     |
| 10 | 0.1845 | 0.3797     | 0.2262 | 0.2668     | 0.3616    |
| 11 | 0.1687 | 0.3645     | 0.495  | 0.2909     | 0.2447    |
| 12 | 0.2485 | 0.259      | 0.2323 | 0.4094     | 0.3602    |
| 13 | 0.3147 | 0.3322     | 0.4407 | 0.2015     | 0.1883    |
| 14 | 0.2436 | 0.3254     | 0.3498 | 0.3715     | 0.2475    |
| 15 | 0.2143 | 0.3184     | 0.399  | 0.3259     | 0.2864    |
| 16 | 0.4375 | 0.3743     | 0.6247 | 0.3307     | 0.1984    |
| 17 | 0.0945 | 0.7554     | 0.4804 | 0.2894     | 0.2347    |
| 18 | 0.1157 | 0.3382     | 0.4022 | 0.2739     | 0.3475    |
| 19 | 0.3124 | 0.3972     | 0.3178 | 0.469      | 0.3314    |
| 20 | 0.2894 | 0.4892     | 0.3484 | 0.3302     | 0.3006    |
| 21 | 0.2657 | 0.3845     | 0.4524 | 0.2478     | 0.2089    |
| 22 | 0.3125 | 0.3957     | 0.3393 | 0.3582     | 0.1974    |
| 23 | 0.4397 | 0.4287     | 0.3391 | 0.275      | 0.2047    |
| 24 | 0.3657 | 0.4675     | 0.4218 | 0.4442     | 0.2675    |
| 25 | 0.3842 | 0.5002     | 0.4417 | 0.354      | 0.2849    |
| 26 | 0.3579 | 0.4895     | 0.3221 | 0.1763     | 0.2478    |
| 27 | 0.3389 | 0.3489     | 0.4046 | 0.2491     | 0.3067    |
| 28 | 0.3984 | 0.3984     | 0.4856 | 0.2975     | 0.2947    |
| 29 | 0.3674 | 0.4007     | 0.4011 | 0.3211     | 0.1984    |
| 30 | 0.4321 | 0.4127     | 0.3357 | 0.3014     | 0.0945    |

Soybean above-ground dry biomass (g)

| n  | SOIL   | MSA<br>1.5 | MSA 5   | MSA<br>7.5 | MSA<br>10 |
|----|--------|------------|---------|------------|-----------|
| 1  | 2.3053 | 4.6062     | 8.9807  | 2.5371     | 2.0883    |
| 2  | 3.5233 | 4.8753     | 10.7135 | 3.6661     | 1.7608    |
| 3  | 2.8724 | 5.1407     | 7.5693  | 1.9973     | 1.7766    |
| 4  | 2.5567 | 2.4766     | 6.1647  | 3.2214     | 2.2014    |
| 5  | 3.6845 | 3.3        | 5.1416  | 2.9095     | 5.4114    |
| 6  | 3.1604 | 5.8708     | 12.7343 | 3.6932     | 4.1287    |
| 7  | 3.912  | 5.2051     | 5.7003  | 2.5873     | 1.6374    |
| 8  | 2.1674 | 2.5248     | 6.2094  | 2.9357     | 2.3415    |
| 9  | 3.9435 | 2.933      | 5.6774  | 2.4958     | 3.3317    |
| 10 | 3.6451 | 3.8175     | 5.2258  | 2.2567     | 4.0875    |
| 11 | 3.1347 | 2.7805     | 5.5107  | 2.6513     | 5.6314    |
| 12 | 4.0614 | 3.985      | 7.1945  | 3.9084     | 3.4783    |
| 13 | 4.8531 | 2.7364     | 6.7875  | 1.3216     | 4.5712    |
| 14 | 2.9066 | 2.8226     | 7.9924  | 3.2244     | 1.2485    |
| 15 | 3.9429 | 2.1368     | 6.6392  | 2.8584     | 1.3478    |
| 16 | 3.8472 | 3.2064     | 5.6918  | 2.2677     | 1.6342    |
| 17 | 3.4024 | 4.4626     | 8.9086  | 3.2414     | 1.6287    |
| 18 | 3.6782 | 4.6084     | 5.0134  | 2.4804     | 2.2475    |
| 19 | 3.4736 | 4.8103     | 5.7048  | 1.3569     | 2.3945    |
| 20 | 3.9974 | 4.4832     | 8.6298  | 4.1038     | 4.1257    |
| 21 | 3.6843 | 4.6134     | 6.7058  | 9.3009     | 3.0745    |
| 22 | 2.8746 | 5.8762     | 5.0554  | 2.6014     | 3.3486    |
| 23 | 4.0214 | 5.5537     | 6.4702  | 3.5768     | 2.4128    |
| 24 | 2.9976 | 3.8947     | 8.7242  | 4.0254     | 3.1284    |
| 25 | 2.8463 | 2.9872     | 6.5666  | 6.1999     | 3.6241    |
| 26 | 3.5796 | 4.4437     | 5.9019  | 4.3178     | 3.302     |
| 27 | 3.9987 | 3.6843     | 6.303   | 5.8745     | 4.0578    |
| 28 | 4.0265 | 3.9965     | 7.2141  | 4.0367     | 4.1265    |
| 29 | 4.5361 | 3.8763     | 6.2598  | 3.9876     | 3.9475    |
| 30 | 4.8927 | 4.0221     | 11.5476 | 5.8756     | 4.8751    |

## Soybean plant height (mm)

| n  | SOIL   | MSA<br>1.5 | MSA 5  | MSA<br>7.5 | MSA<br>10 |
|----|--------|------------|--------|------------|-----------|
| 1  | 268.09 | 332.19     | 295.36 | 298.42     | 248.58    |
| 2  | 255.46 | 316.92     | 255.6  | 302.17     | 250.96    |
| 3  | 293.05 | 282.81     | 280.65 | 258.12     | 253.35    |
| 4  | 284.64 | 307.53     | 302.71 | 278.94     | 206.78    |
| 5  | 267.93 | 267.76     | 267.38 | 275.74     | 257.49    |
| 6  | 271.4  | 303.27     | 247.89 | 256.27     | 199.06    |
| 7  | 282.36 | 303.27     | 280.27 | 306.15     | 263.22    |
| 8  | 231.48 | 282.59     | 299.01 | 242.43     | 238.02    |
| 9  | 237.59 | 305.06     | 302.45 | 298.85     | 240.1     |
| 10 | 252.73 | 300.34     | 298.63 | 278.39     | 258.25    |
| 11 | 309.24 | 282.17     | 306.26 | 250.28     | 226.99    |
| 12 | 314.86 | 287.71     | 284.42 | 288.93     | 255.77    |
| 13 | 289.96 | 309.21     | 301.77 | 226.51     | 221.02    |
| 14 | 278.24 | 276.79     | 286.05 | 309.24     | 231.38    |
| 15 | 290.92 | 269.95     | 306.92 | 263.46     | 258.5     |
| 16 | 274.94 | 381.27     | 280.31 | 275.17     | 193.71    |
| 17 | 287.9  | 304.17     | 329.12 | 248.31     | 172.6     |
| 18 | 297.23 | 262.75     | 328.11 | 268.07     | 270.76    |
| 19 | 309.24 | 300.64     | 321.87 | 302.61     | 266.33    |
| 20 | 299.11 | 358.75     | 337.15 | 283.56     | 175.71    |
| 21 | 291.22 | 276.06     | 362.1  | 282.19     | 265.23    |
| 22 | 329.24 | 289.32     | 327.38 | 266.93     | 261.85    |
| 23 | 284.99 | 330.5      | 309.24 | 286.03     | 172.21    |
| 24 | 295.2  | 342.3      | 309.24 | 300.04     | 244.22    |
| 25 | 284.75 | 286.99     | 312.85 | 260.99     | 278.41    |
| 26 | 206.47 | 290.73     | 314.25 | 264.57     | 257.34    |
| 27 | 296.12 | 242.73     | 298.67 | 323        | 219.75    |
| 28 | 295.14 | 267.19     | 279.86 | 267.42     | 185.99    |
| 29 | 299.18 | 286.18     | 363.45 | 266.98     | 176.84    |
| 30 | 297.36 | 301.54     | 374.86 | 279.56     | 186.84    |

Soybean stem width (mm)

| n  | SOIL | MSA<br>1.5 | MSA 5 | MSA<br>7.5 | MSA<br>10 |
|----|------|------------|-------|------------|-----------|
| 1  | 3.46 | 3.3        | 3.34  | 2.61       | 2.82      |
| 2  | 3.9  | 3.27       | 3.41  | 3.4        | 2.35      |
| 3  | 3.21 | 2.6        | 2.89  | 3.86       | 3.88      |
| 4  | 2.42 | 3.54       | 3.37  | 2.79       | 3.05      |
| 5  | 3.16 | 2.79       | 2.95  | 2.88       | 3.43      |
| 6  | 3.24 | 2.69       | 2.78  | 2.77       | 3.49      |
| 7  | 3.22 | 3.32       | 2.99  | 3.36       | 2.89      |
| 8  | 3.21 | 2.59       | 3.35  | 3.57       | 3.51      |
| 9  | 3.1  | 2.86       | 3.53  | 2.2        | 2.76      |
| 10 | 2.85 | 2.7        | 3.17  | 2.66       | 3.18      |
| 11 | 3.12 | 2.82       | 3.13  | 2.9        | 3.28      |
| 12 | 3.45 | 2.44       | 2.84  | 2.84       | 3.24      |
| 13 | 2.73 | 3.17       | 3.12  | 2.91       | 3.33      |
| 14 | 3.12 | 2.67       | 2.92  | 3.45       | 3.34      |
| 15 | 3.25 | 3.01       | 2.75  | 3.42       | 2.72      |
| 16 | 3.36 | 3.15       | 3.74  | 3.34       | 3.29      |
| 17 | 2.97 | 3.25       | 2.53  | 2.65       | 3.51      |
| 18 | 3.16 | 3.14       | 2.94  | 2.34       | 3.52      |
| 19 | 2.69 | 3.2        | 3.29  | 2.76       | 3.48      |
| 20 | 2.74 | 2.9        | 2.76  | 2.96       | 3.14      |
| 21 | 3.44 | 2.67       | 2.52  | 2.99       | 1.84      |
| 22 | 3.21 | 3.36       | 2.96  | 3.11       | 3.5       |
| 23 | 3.23 | 3.41       | 2.98  | 3.35       | 2.9       |
| 24 | 2.85 | 3.36       | 3.06  | 2.69       | 3.49      |
| 25 | 3.49 | 3.4        | 2.93  | 2.34       | 3.21      |
| 26 | 3.7  | 3.42       | 3.14  | 3.12       | 2.89      |
| 27 | 3.45 | 2.98       | 3.43  | 3.81       | 2.45      |
| 28 | 3.28 | 2.86       | 3.35  | 2.87       | 3.31      |
| 29 | 2.94 | 2.75       | 3.07  | 3.27       | 3.05      |
| 30 | 2.78 | 2.68       | 2.74  | 3.12       | 2.99      |

## Soybean leaf blade width (mm)

| n  | SOIL  | MSA<br>1.5 | MSA 5 | MSA<br>7.5 | MSA<br>10 |
|----|-------|------------|-------|------------|-----------|
| 1  | 34.26 | 19.48      | 34.47 | 24.11      | 30.93     |
| 2  | 32.11 | 25.49      | 37.11 | 32.31      | 28.41     |
| 3  | 29.27 | 32.52      | 42.51 | 32.77      | 24.09     |
| 4  | 35.53 | 37.43      | 29.57 | 28.98      | 33.82     |
| 5  | 33.07 | 36         | 38.13 | 34.01      | 31.29     |
| 6  | 30.63 | 30.73      | 26.02 | 32.51      | 34.82     |
| 7  | 29.25 | 32.05      | 28.16 | 33.13      | 28.63     |
| 8  | 30.94 | 29.41      | 33.04 | 27.33      | 24.95     |
| 9  | 27.33 | 27.62      | 33.71 | 18.75      | 31.34     |
| 10 | 26.27 | 30.17      | 31.96 | 30.15      | 35.99     |
| 11 | 25.23 | 32.72      | 31.58 | 29.53      | 28.5      |
| 12 | 31.68 | 26.94      | 29.71 | 30.94      | 32.59     |
| 13 | 28.37 | 37.39      | 35.33 | 30.26      | 38.26     |
| 14 | 33.16 | 24.77      | 30.27 | 22.76      | 25.07     |
| 15 | 29.93 | 32.48      | 30.13 | 33.39      | 29.04     |
| 16 | 28.92 | 32.42      | 32.32 | 29.96      | 22.06     |
| 17 | 37.62 | 30.56      | 31.63 | 31.96      | 31.06     |
| 18 | 27.35 | 31.73      | 30.44 | 24.36      | 27.59     |
| 19 | 33.37 | 31.78      | 30.54 | 36.99      | 32.89     |
| 20 | 30.62 | 32.39      | 31.63 | 24.26      | 21.21     |
| 21 | 23.82 | 33.11      | 33.51 | 31.78      | 39.15     |
| 22 | 31.4  | 27.19      | 36    | 30.09      | 29.77     |
| 23 | 22.56 | 38.26      | 29.06 | 30.66      | 31.77     |
| 24 | 23.3  | 31.35      | 33.83 | 24.14      | 26.74     |
| 25 | 26.75 | 31.54      | 31.65 | 33.63      | 33.12     |
| 26 | 31.05 | 32.75      | 29.23 | 33.05      | 29.84     |
| 27 | 29    | 29.84      | 35.17 | 31.05      | 30.64     |
| 28 | 26.41 | 27.55      | 33.34 | 33.48      | 27.36     |
| 29 | 33.27 | 37.64      | 29.58 | 30.87      | 31.45     |
| 30 | 30.89 | 26.48      | 30.48 | 36.87      | 31.84     |

## Soybean yield (g)

| Set       | SOIL   | MSA<br>1.5 | MSA 5   | MSA<br>7.5 | MSA<br>10 |
|-----------|--------|------------|---------|------------|-----------|
| Subplot 1 | 5.4184 | 4.9475     | 10.1726 | 2.0145     | 1.0945    |
| Subplot 2 | 6.1243 | 5.0126     | 11.3704 | 1.9245     | 2.0145    |
| Subplot 3 | 3.875  | 5.8971     | 10.001  | 1.5551     | 0.8749    |

## Alfalfa root dry biomass (g)

| n  | SOIL   | MSA<br>1.5 | MSA 5   | MSA<br>7.5 | MSA<br>10 | MSA<br>15 | MSA<br>20 |
|----|--------|------------|---------|------------|-----------|-----------|-----------|
| 1  | 0.0287 | 0.0274     | 0.0336  | 0.0502     | 0.0531    | 0.0556    | 0.0329    |
| 2  | 0.0328 | 0.0306     | 0.0399  | 0.0489     | 0.0549    | 0.0533    | 0.0422    |
| 3  | 0.0219 | 0.0254     | 0.0224  | 0.053      | 0.0715    | 0.0446    | 0.0388    |
| 4  | 0.0221 | 0.0173     | 0.0274  | 0.0588     | 0.0828    | 0.0488    | 0.0417    |
| 5  | 0.0378 | 0.0339     | 0.00282 | 0.057      | 0.0533    | 0.0488    | 0.0546    |
| 6  | 0.0261 | 0.0196     | 0.0273  | 0.0402     | 0.075     | 0.0561    | 0.0503    |
| 7  | 0.0286 | 0.0329     | 0.0389  | 0.0413     | 0.089     | 0.0457    | 0.0447    |
| 8  | 0.0136 | 0.0197     | 0.0244  | 0.0481     | 0.088     | 0.0732    | 0.0473    |
| 9  | 0.0229 | 0.0344     | 0.0256  | 0.0475     | 0.0684    | 0.0533    | 0.0504    |
| 10 | 0.0212 | 0.0113     | 0.0267  | 0.0439     | 0.0655    | 0.073     | 0.0402    |
| 11 | 0.023  | 0.0245     | 0.0344  | 0.0547     | 0.0641    | 0.0624    | 0.0429    |
| 12 | 0.0193 | 0.0264     | 0.0314  | 0.0489     | 0.0509    | 0.0846    | 0.0389    |
| 13 | 0.0112 | 0.0302     | 0.0309  | 0.0521     | 0.0542    | 0.0486    | 0.0202    |
| 14 | 0.0124 | 0.0292     | 0.0282  | 0.0471     | 0.0692    | 0.0509    | 0.0281    |
| 15 | 0.0189 | 0.0242     | 0.03    | 0.0503     | 0.0614    | 0.0453    | 0.0408    |

Alfalfa above-ground dry biomass (g)

| n  | SOIL   | MSA<br>1.5 | MSA 5  | MSA<br>7.5 | MSA<br>10 | MSA<br>15 | MSA<br>20 |
|----|--------|------------|--------|------------|-----------|-----------|-----------|
| 1  | 0.0268 | 0.0503     | 0.0923 | 0.1238     | 0.1045    | 0.1079    | 0.0745    |
| 2  | 0.0449 | 0.0673     | 0.0806 | 0.1043     | 0.0994    | 0.0986    | 0.1329    |
| 3  | 0.0421 | 0.0305     | 0.0533 | 0.1011     | 0.1084    | 0.0899    | 0.0751    |
| 4  | 0.0287 | 0.0338     | 0.0612 | 0.0913     | 0.1348    | 0.0788    | 0.0931    |
| 5  | 0.0446 | 0.0515     | 0.0683 | 0.0811     | 0.1133    | 0.0933    | 0.0855    |
| 6  | 0.0220 | 0.0342     | 0.0625 | 0.0863     | 0.1318    | 0.1461    | 0.1321    |
| 7  | 0.0271 | 0.0481     | 0.0554 | 0.097      | 0.1715    | 0.0965    | 0.0738    |
| 8  | 0.0200 | 0.0248     | 0.0669 | 0.1054     | 0.1612    | 0.1219    | 0.0704    |
| 9  | 0.0567 | 0.0529     | 0.0684 | 0.1139     | 0.1251    | 0.1749    | 0.0993    |
| 10 | 0.0306 | 0.0334     | 0.0953 | 0.1539     | 0.1074    | 0.1414    | 0.0854    |
| 11 | 0.0444 | 0.0469     | 0.0662 | 0.1109     | 0.145     | 0.1044    | 0.0879    |
| 12 | 0.0576 | 0.0301     | 0.0828 | 0.0989     | 0.1001    | 0.0874    | 0.0712    |
| 13 | 0.0218 | 0.0622     | 0.0609 | 0.0942     | 0.159     | 0.1067    | 0.0863    |
| 14 | 0.0243 | 0.0618     | 0.0659 | 0.0943     | 0.1277    | 0.1086    | 0.0873    |
| 15 | 0.0293 | 0.0391     | 0.061  | 0.0987     | 0.0907    | 0.1088    | 0.0784    |

## Alfalfa plant height (mm)

| n  | SOIL  | MSA 1.5 | MSA 5 | MSA 7.5 | MSA 10 | MSA 15 | MSA 20 |
|----|-------|---------|-------|---------|--------|--------|--------|
| 1  | 31.01 | 31.61   | 84.03 | 84.76   | 96.71  | 76.20  | 62.01  |
| 2  | 46.96 | 40.60   | 84.39 | 86.47   | 116.99 | 77.89  | 73.25  |
| 3  | 18.11 | 39.03   | 82.47 | 87.24   | 120.45 | 83.46  | 73.43  |
| 4  | 27.69 | 35.62   | 81.15 | 89.10   | 102.88 | 84.79  | 75.29  |
| 5  | 27.56 | 41.25   | 77.13 | 81.24   | 105.97 | 71.99  | 66.07  |
| 6  | 33.56 | 36.79   | 80.53 | 84.57   | 114.69 | 74.25  | 79.94  |
| 7  | 27.89 | 41.31   | 77.02 | 88.95   | 100.15 | 73.45  | 76.46  |
| 8  | 22.59 | 44.97   | 80.23 | 82.45   | 105.90 | 79.24  | 67.54  |
| 9  | 36.57 | 39.27   | 78.39 | 81.72   | 102.98 | 70.64  | 76.46  |
| 10 | 28.58 | 44.10   | 83.14 | 84.96   | 98.82  | 70.46  | 61.54  |
| 11 | 25.83 | 43.09   | 76.16 | 85.39   | 115.45 | 69.89  | 62.41  |
| 12 | 33.00 | 33.24   | 78.02 | 85.59   | 112.34 | 73.14  | 70.24  |
| 13 | 37.63 | 36.88   | 79.96 | 88.56   | 100.98 | 68.79  | 71.25  |
| 14 | 31.75 | 40.05   | 86.14 | 85.62   | 117.84 | 65.12  | 69.85  |
| 15 | 23.79 | 39.84   | 78.26 | 89.74   | 124.16 | 70.34  | 75.42  |

## Calcimetry results

| Amendment | No plant | Soybean | Alfalfa |
|-----------|----------|---------|---------|
| SOIL      | 0.009    | 0.018   | 0.026   |
| MSA 1.5   | 0.003    | 0.344   | 0.264   |
| MSA 5     | 0.044    | 0.838   | 0.694   |
| MSA 7.5   | 0.159    | 1.291   | 1.535   |
| MSA 10    | 0.246    | 1.351   | 2.372   |
| MSA 15    | 0.274    | -       | 3.216   |
| MSA 20    | 0.106    | -       | 0.493   |



## References:

Environment and Climate Change Canada. (2019).

[http://climate.weather.gc.ca/climate\\_data/hourly\\_data\\_e.html?hlyRange=2010-04-06%7C2019-09-07&dlyRange=2010-04-18%7C2019-09-07&mlyRange=%7C&StationID=48569&Prov=ON&urlExtension=\\_e.html&searchType=stnName&optLimit=yearRange&StartYear=1840&EndYear=2019&selRowPerPage=25&Line=0&searchMethod=contains&txtStationName=waterloo&timeframe=1&Year=2018&Month=6&Day=1#](http://climate.weather.gc.ca/climate_data/hourly_data_e.html?hlyRange=2010-04-06%7C2019-09-07&dlyRange=2010-04-18%7C2019-09-07&mlyRange=%7C&StationID=48569&Prov=ON&urlExtension=_e.html&searchType=stnName&optLimit=yearRange&StartYear=1840&EndYear=2019&selRowPerPage=25&Line=0&searchMethod=contains&txtStationName=waterloo&timeframe=1&Year=2018&Month=6&Day=1#)

[Accessed September 7, 2019).

Dudhaiya, A., Haque, F., Fantucci, H., & Santos, R. M. (2019). Characterization of Physically Fractionated Wollastonite-Amended Agricultural Soils. *Minerals*. 9(10): 635. doi: 10.3390/min9100635
